# Supplementary material for: Sexual difference of depressive-like behavior on Neuronal growth regulator 1-knockout mice
Source: Research Square preprint supplement (doi:10.21203/rs.3.rs-6804161/v1), 2025-08-14
Supplement: Supplementary file 1 [file aebb10759d7c1c1be8935069.pdf]

**A**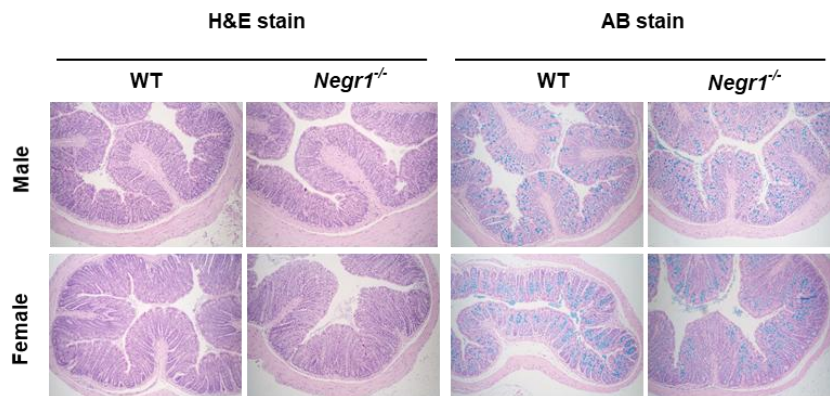**B**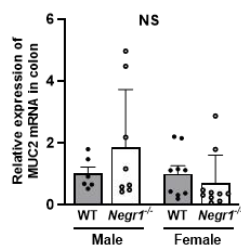**C**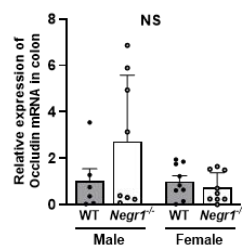**D**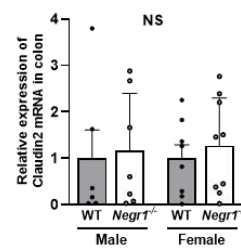**E**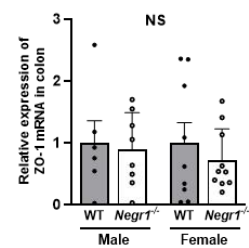

Supplementary figure 1. Structural status and tight junction expression of the large intestine. (A) Representative images of H&E and AB staining of the colon from WT and *Negr1*<sup>-/-</sup> mice. Scale bar, 100 μm. (B-E) Expression of MUC2, Occludin, Claudin2 and ZO-1 mRNA in colon tissues measured by RT-qPCR.
